# Supplementary material for: Phosphorylation-Mediated Molecular Pathway Changes in Human Pituitary Neuroendocrine Tumors Identified by Quantitative Phosphoproteomics
Source: MDPI journal article supplement (doi:10.3390/cells10092225), 2021-08-27
Supplement: s1 [file s1]

**Table S5.** Statistically significant GO molecular functions (MF) of differentially phosphorylated proteins in human nonfunctional PitNETs.

| ID        | Molecular functions | Count | %    | PValue  | Genes name                                                                                                                                                                                                                                                                                                                                                                                                                                                                                                                                                                                                                                                                                                                                                                                                                                                                                                                                                                                                                                                                                                                                                                                                                                                                                                     |
|-----------|---------------------|-------|------|---------|----------------------------------------------------------------------------------------------------------------------------------------------------------------------------------------------------------------------------------------------------------------------------------------------------------------------------------------------------------------------------------------------------------------------------------------------------------------------------------------------------------------------------------------------------------------------------------------------------------------------------------------------------------------------------------------------------------------------------------------------------------------------------------------------------------------------------------------------------------------------------------------------------------------------------------------------------------------------------------------------------------------------------------------------------------------------------------------------------------------------------------------------------------------------------------------------------------------------------------------------------------------------------------------------------------------|
| GO:004482 | poly(A) RNA binding | 146   | 25.7 | 4.9E-51 | Q12906, Q15287, Q9UPN3, O75494, P27816, A0A0U4BW16, Q9UQ35, H0YBE0, Q14137, P05455, Q13283, Q16629, Q96T37, Q00839, Q08J23, Q9BZZ5, Q8TDD1, E7EX17, O00567, Q8ND56, A0A0S2Z4Z6, Q92522, A0A140VKC4, Q7Z6E9, Q15149, Q9UKV3, P08238, Q8N1G4, P16402, O75131, Q12996, Q15459, Q9Y4W2, Q9Y6G9, Q9NWH9, Q13595, Q32P45, O43823, O75475, Q9UPT8, Q9Y2W1, Q05193, Q6PKG0, Q9H0G5, A0A0A0MR66, P53999, C9J6P4, P51858, O43395, Q8NE71, P27824, Q9UPQ9, P35611, P05388, Q86VM9, A0A024R0Z3, Q8N8A6, B4DR36, Q13442, Q59GJ0, Q14157, P52756, Q02040, Q9BXP5, Q1KMD3, Q08170, A8MXP9, A0A024RAN2, Q92614, Q9GZR7, O75400, Q5VTL8, Q16513, O43719, P55081, Q01130, A0A0A0MRM9, Q9Y3T9, Q9H6F5, Q9H0D6, Q66PJ3, Q92769, Q9NYF8, A0A087WUZ3, P35221, P31943, Q9GZT3, P18615, Q6PJT7, Q5JSZ5, Q9BRJ6, Q15424, Q9P2K5, Q9Y2H6, B4DY08, Q9H307, Q13425, Q13428, Q13242, Q13427, Q9NXG2, P09651, A0A024R4E5, Q6P158, Q13895, P21127, P18583, P15924, Q13247, P49756, Q96T58, O95218, P21333, P35579, Q9Y5J1, Q8WXD2, O60841, A0A024RDB2, Q9HCD5, Q9HBL0, Q8NEY8, P19338, P04792, Q9C0C9, Q9BRD0, Q86XP3, O95104, O75533, Q14694, Q96KR1, P23588, Q14498, P07900, O60832, Q5T200, Q9UKJ3, Q09666, Q92945, Q6NZI2, Q9H1E3, O75643, Q86UE4, Q7Z6Z7, J3KTL2, O60763, P35659, P07910, Q7L4I2, C9JFV4, Q05519, O76021, Q14103, P43243 |

|            |                 |     |      |         |                                                                                                                                                                                                                                                                                                                                                                                                                                                                                                                                                                                                                                                                                                                                                                                                                                                                                                                                                                                                                                                                                                                                                                                                                                                                                                                                                                                                                                                                                                                                                                                                                                                                                                                                                                                                                                                                                                                                                        |
|------------|-----------------|-----|------|---------|--------------------------------------------------------------------------------------------------------------------------------------------------------------------------------------------------------------------------------------------------------------------------------------------------------------------------------------------------------------------------------------------------------------------------------------------------------------------------------------------------------------------------------------------------------------------------------------------------------------------------------------------------------------------------------------------------------------------------------------------------------------------------------------------------------------------------------------------------------------------------------------------------------------------------------------------------------------------------------------------------------------------------------------------------------------------------------------------------------------------------------------------------------------------------------------------------------------------------------------------------------------------------------------------------------------------------------------------------------------------------------------------------------------------------------------------------------------------------------------------------------------------------------------------------------------------------------------------------------------------------------------------------------------------------------------------------------------------------------------------------------------------------------------------------------------------------------------------------------------------------------------------------------------------------------------------------------|
| GO:0005515 | protein binding | 412 | 72.4 | 2.1E-33 | <p>Q13200, Q96TC7, Q5JTV8, Q4KMP7, Q5H9R7, O75494, P27816, P85037, A0A0U4BW16, Q9BUT9, P55196, H0YBE0, P50502, O75694, O15320, O75554, Q92922, Q00839, Q9P2D1, Q9NTI5, Q9BZZ5, A0A024R098, A0A140VKC4, Q13207, Q9Y6G9, O75376, P16157, Q2M2I8, O75379, O75475, Q96FV9, Q05193, Q96B36, Q6PKG0, P01008, Q16849, P07948, Q8NE71, P27824, Q9ULH1, A0A024R0Z3, B4DR36, Q92504, P52756, P07814, Q08170, Q13439, P55081, O15085, Q01130, A0A0S2Z5H6, Q9H6F5, O75151, P35221, P31943, Q01484, Q04727, Q13425, Q13428, Q13427, Q14194, O15173, A0A024R4E5, P21127, P18583, P01042, Q13107, P21333, Q9H2G2, Q07960, Q8NDX5, Q5XUX1, O15061, Q96PU4, Q9HCD5, O95747, P24534, P04792, P19338, P27105, P25788, Q96D71, O95400, Q13547, P07900, Q9H7L9, P08670, Q08999, Q8ND76, P31323, Q99502, Q9Y6D5, Q6KC79, Q9NSK0, J3KTL2, P07910, C9JFV4, Q9Y3D3, Q9UNE7, Q15287, P51531, Q9UPN3, Q08AD1, Q13144, P52701, Q9NYB0, O60291, Q8N7H5, Q4VCS5, P02730, Q16623, O15027, Q13283, Q16629, Q7Z5K2, Q6PD62, Q9H4A6, D3DUW5, Q5VZL5, O00567, P50479, P11277, A0A0S2Z4Z6, Q15149, Q92733, P02545, Q16637, Q8WWQ0, O60486, P80723, Q9UQ16, Q9Y2F5, Q9Y608, P45880, O60271, Q15121, P49006, Q9Y4G6, Q9UPT6, C9J650, P53999, Q14980, Q13131, P02671, Q16799, P05060, P60174, Q9UPQ9, Q9Y618, P07197, A0A140VK92, Q6DEN2, P49023, Q5JVS0, Q92614, P22059, Q13129, Q16514, O75400, Q53EL6, Q16513, Q5SSJ5, Q96T60, Q92769, Q9UBB9, Q9NYF8, Q13185, A0A087WUZ3, P22466, P11171, P11166, Q92625, Q13242, Q5T1M5, Q15388, Q13895, Q96ST2, Q9H4G0, Q9BSQ5, Q13247, Q96T58, Q9BTU6, P16949, A0A024RDB2, P17600, Q9HBL0, E7EX44, Q8NEY8, P02751, O75533, P68871, Q16555, Q5T200, Q9Y2J2, Q92945, F5H757, P29375, P49840, A0A024R2C5, O75643, Q12888, Q96I25, P13521, P25490, Q96KC8, O00505, Q9HCN4, P29590, P23193, Q9UK58, A0A0A0MS54, P11137, P82094, O95391, Q9Y5Y0, B7Z6G2, P49792, O60716, Q43294, Q96T37, O60504, E7EX17, P10515, O95251, Q7Z6E9, Q9UKV3, Q9BZH6, Q8N1G4,</p> |
|------------|-----------------|-----|------|---------|--------------------------------------------------------------------------------------------------------------------------------------------------------------------------------------------------------------------------------------------------------------------------------------------------------------------------------------------------------------------------------------------------------------------------------------------------------------------------------------------------------------------------------------------------------------------------------------------------------------------------------------------------------------------------------------------------------------------------------------------------------------------------------------------------------------------------------------------------------------------------------------------------------------------------------------------------------------------------------------------------------------------------------------------------------------------------------------------------------------------------------------------------------------------------------------------------------------------------------------------------------------------------------------------------------------------------------------------------------------------------------------------------------------------------------------------------------------------------------------------------------------------------------------------------------------------------------------------------------------------------------------------------------------------------------------------------------------------------------------------------------------------------------------------------------------------------------------------------------------------------------------------------------------------------------------------------------|

Q12996, Q15459, P18206, P17252, P35606, Q9UDY2, Q8NFD5, F8VXC8, Q9NZN5,  
Q12789, P42858, Q13098, C9J6P4, Q7Z4V5, Q02952, Q9NVM9, O43395, Q99996,  
P56597, P78559, Q8WX93, P41236, Q29RF7, Q14839, Q9P035, P20020, Q15084,  
Q13085, Q96T23, Q9BXP5, Q9UQN3, Q9Y3T9, Q9UEW8, A0A024R2M8, Q15762,  
Q9B XK5, Q15424, Q5JSZ5, Q6PJT7, Q9BRJ6, Q15036, P05408, P09651, Q6P158,  
Q9NQT8, B7ZKY2, P02675, Q08495, P49756, Q5VTR2, O95218, Q15773, Q13813,  
A0A0G2JMX7, B7Z351, Q12955, Q9NRX5, O60841, O60941, Q6IAA8, Q9C0C9,  
O94874, P13224, Q14694, P23588, Q14498, O60832, P83916, Q09666, O43765,  
Q53EW6, Q6NZI2, P17096, Q9Y2Q0, P52948, Q9UN37, Q15435, P43243, O43493,  
Q12906, O43847, D6REX3, Q14137, P05455, P55011, Q9UQE7, Q9P2G1, P15056,  
O00161, P18669, P23634, Q14676, Q3KNV8, Q07889, Q96EZ8, P08238, A5PL32,  
O75131, Q5SPY9, P49407, Q9UHB6, P34932, Q32P45, O43823, A0A024R1S8, O94979,  
Q9Y2W1, Q96JM3, Q9UKN8, Q9H0G5, A0A0A0MR66, O00264, O75122, Q8WVC0,  
Q9P2I0, E9PRY8, Q8IV36, Q5JWF2, P05387, P05388, B3KUY2, Q86VM9, Q13501,  
Q14157, Q02040, A8MXP9, A0A024RAN2, Q92597, P26232, A0A0A0MRM9, Q14247,  
Q66PJ3, Q9H0D6, Q96C24, E9PDH4, Q9GZT3, P21796, Q02156, P18615, Q9UNZ2,  
Q5JTD0, Q02410, B4DY08, Q9Y2X7, Q9NXG2, P15924, Q9BWW4, P49450, O43150,  
P17029, P35579, P35580, O95292, Q9BY44, P12694, O95365, O14545, Q13627,  
P46821, P07359, Q9BW71, Q9BRD0, Q86XP3, O95671, Q9H0B6, Q96KR1, Q9NYV4,  
A0A0A0MT33, Q9UKJ3, O14576, P01241, P35749, O14579, Q9NPJ4, Q9BWU0,  
P63027, Q8WXF7, Q96K21, P46100, P19634, Q7Z6Z7, Q86UE4, O96019, Q149N5,  
C9JA93, O60763, A0A0A0MS29, O75396, Q9H2P0, Q05519, O94921, Q14103, P35658

|            |                                                       |    |     |         |                                                                                                                                                                                                                                                                                                                                                                                                                            |
|------------|-------------------------------------------------------|----|-----|---------|----------------------------------------------------------------------------------------------------------------------------------------------------------------------------------------------------------------------------------------------------------------------------------------------------------------------------------------------------------------------------------------------------------------------------|
| GO:0000166 | nucleotide binding                                    | 46 | 8.1 | 7.7E-16 | Q15287, P26378, Q13595, Q9NWH9, O95104, O75494, P45880, Q32P45, P31943, Q9GZT3, P18615, P23588, Q14498, P07900, A0A0A0MT33, Q9BZC7, Q15424, Q9P2K5, A0A0A0MR66, P05455, Q13283, Q16629, B4DY08, Q96T37, P51858, Q13242, P09651, Q9UPQ9, Q13247, P49756, Q96T58, E7EX17, Q96I25, P20020, J3KTL2, P52756, P07910, Q02040, Q9UKV3, Q9BXP5, Q08170, A0A024RDB2, A8MXP9, P53805, Q05519, Q14103, O43719, P43243, P19338, Q01130 |
| GO:0098641 | cadherin binding<br>involved in cell-cell<br>adhesion | 40 | 7.0 | 2.0E-14 | Q9UHB6, Q9UPN3, P18206, Q9H0B6, A0A087WUZ3, Q9UDY2, P35221, A0A0U4BW16, A0A024R1S8, Q9C0C2, P55196, Q6PKG0, Q09666, O60716, C9J6P4, P42166, A0A024R4E5, E9PRY8, Q9H4G0, Q9ULH1, P35611, Q9H2G2, P21333, Q07960, O00567, Q92522, P35579, Q13813, Q15149, O60763, P08238, O95292, Q9UQN3, Q9BY44, A0A024RAN2, Q16513, O76021, E7EX44, Q92597, P26232, Q14247                                                                 |
| GO:0005200 | structural constituent<br>of cytoskeleton             | 21 | 3.7 | 2.3E-10 | Q9UEY8, Q9H4G0, P15924, P07197, P16157, A0A087WUZ3, P11171, Q9Y4G6, P11277, Q01484, Q16352, Q13813, O43491, A0A0G2JMX7, O15061, Q12955, P08670, Q9Y2J2, P12036, O60504, P26232                                                                                                                                                                                                                                             |
| GO:0005198 | structural molecule<br>activity                       | 30 | 5.3 | 1.3E-09 | Q9UEY8, P18206, P35606, P11137, P27816, P16157, P35221, P11171, Q9Y4G6, O43491, P48681, P08670, Q9Y2J2, Q9H307, Q13425, Q14980, O14579, P02671, Q9H4G0, P15924, P78559, P35612, P35611, P07197, P02675, Q3KQU3, P02545, A8MXP9, P12036, P43243, P46821                                                                                                                                                                     |
| GO:0030507 | spectrin binding                                      | 11 | 1.9 | 3.2E-09 | Q12955, Q08AD1, P35612, Q08495, P35611, O14576, Q16849, P16157, P11171, Q01484, O43491                                                                                                                                                                                                                                                                                                                                     |
| GO:0003723 | RNA binding                                           | 44 | 7.7 | 4.2E-08 | Q12906, Q15287, P26378, Q15477, O75494, L0R530, Q96FV9, P31943, P18615, P23588, Q14498, O60832, A0A0A0MT33, P05455, P49792, B4DY08, Q92945, Q9NXG2, Q00839, Q9P2I0, P09651, A0A024R4E5, P18583, Q13247, Q8TDD1, O95218, Q99502, E7EX17, Q96I25, P25490, Q59GJ0, O00567, P52948, J3KTL2, P52756, P07910, Q8N1G4, Q16637, Q53EL6, O75400, Q12996, Q14103, O76021, O43719, P19338, Q15459                                     |

|            |                             |    |     |         |                                                                                                                                                                                                                                                                                            |
|------------|-----------------------------|----|-----|---------|--------------------------------------------------------------------------------------------------------------------------------------------------------------------------------------------------------------------------------------------------------------------------------------------|
| GO:0003682 | chromatin binding           | 34 | 6.0 | 3.3E-07 | Q9Y3T9, P51531, P52701, Q92769, O75475, F8VXC8, Q8N7H5, P18615, Q13547, P83916, Q15424, Q04727, Q92922, Q7Z4V5, Q9UQE7, Q9P2D1, Q13131, Q02880, Q9H1E3, Q9Y618, P46100, Q5VTR2, Q6KC79, P49450, P17096, B4DR36, O96019, P05114, A0A140VKC4, P35659, Q9H2P0, C9JFV4, Q9HCD5, Q14103, Q5SSJ5 |
| GO:0051015 | actin filament binding      | 18 | 3.2 | 9.4E-07 | Q9UHB6, Q9UPN3, Q0ZGT2, P35612, P35611, P28290, P21333, A0A0U4BW16, P35221, Q9Y4G6, A0A024R1S8, P11277, P35579, P35580, O75122, P29966, Q92614, P35749, P26232                                                                                                                             |
| GO:0005516 | calmodulin binding          | 21 | 3.7 | 2.5E-06 | P63027, Q9UEY8, Q08AD1, P49585, B7ZKY2, P35612, P23634, P35611, A0A087WUZ3, P11137, P19634, A0A0U4BW16, P20020, P49006, P11171, P35579, Q13813, P35580, P29966, Q13425, E7EX44, P35749                                                                                                     |
| GO:0008017 | microtubule binding         | 21 | 3.7 | 1.1E-05 | D3DUW5, Q9NQT8, Q9UPN3, Q9UQ16, P78559, P07197, Q14839, P27816, P11137, L0R530, Q16555, A0A0G2JMX7, Q05193, O95292, P12036, O75122, O14576, Q9Y3E1, Q92597, P46821, Q14980                                                                                                                 |
| GO:0003779 | actin binding               | 24 | 4.2 | 2.8E-05 | Q9UEY8, Q9UPN3, P18206, A0A087WUZ3, A0A0U4BW16, P11171, P49006, Q9Y4G6, O43491, Q9Y2J2, Q13425, Q5T1M5, Q9H4G0, P35612, Q08495, Q8WX93, P35611, P11277, P35579, Q13813, P35580, Q15149, P17600, Q9HBL0, E7EX44                                                                             |
| GO:0003729 | mRNA binding                | 15 | 2.6 | 4.2E-05 | Q9BWU0, P26378, P49756, Q32P45, O75533, J3KTL2, P52756, A0A140VKC4, P07900, Q9H0G5, P05455, Q13283, Q9BY44, A0A024RDB2, Q12996, A0A0A6YYJ8                                                                                                                                                 |
| GO:0031492 | nucleosomal DNA binding     | 9  | 1.6 | 8.7E-05 | Q13547, P05114, P07910, Q92769, Q14839, B4DY08, Q92922, P49450, O96019, F8VXC8                                                                                                                                                                                                             |
| GO:0030674 | protein binding, bridging   | 11 | 1.9 | 1.5E-04 | P02671, Q16623, P15924, Q12955, P02675, P50502, P12036, P19634, Q9UDY2, Q01484, Q9UNE7                                                                                                                                                                                                     |
| GO:0004386 | helicase activity           | 11 | 1.9 | 3.5E-04 | P51531, Q15477, Q86XP3, O75643, P46100, E7EX17, A0A024R0Z3, Q9GZR7, Q8N8A6, Q6P158, Q9P2D1, P23588                                                                                                                                                                                         |
| GO:0042826 | histone deacetylase binding | 12 | 2.1 | 3.9E-04 | Q13547, A0A140VKC4, P07900, Q02880, Q9H7L9, Q9Y618, P08238, O75376, Q6KC79, O43823, Q14103, Q16513                                                                                                                                                                                         |

|            |                                         |    |     |         |                                                                                                                                                                                                                                                                                                                                                                                                                                                |
|------------|-----------------------------------------|----|-----|---------|------------------------------------------------------------------------------------------------------------------------------------------------------------------------------------------------------------------------------------------------------------------------------------------------------------------------------------------------------------------------------------------------------------------------------------------------|
| GO:1990226 | histone<br>methyltransferase<br>binding | 4  | 0.7 | 5.9E-04 | P83916, P08238, Q13185, O00567                                                                                                                                                                                                                                                                                                                                                                                                                 |
| GO:0044325 | ion channel binding                     | 12 | 2.1 | 9.2E-04 | Q16623, P07900, Q99996, Q12955, P08238, P42858, P21333, Q14694, P49407, Q01484, P21796, P07948                                                                                                                                                                                                                                                                                                                                                 |
| GO:0004004 | ATP-dependent RNA<br>helicase activity  | 9  | 1.6 | 1.0E-03 | Q15477, Q86XP3, Q13283, O75643, Q8TDD1, Q32P45, A0A024R0Z3, Q9GZR7, Q8N8A6, Q6P158                                                                                                                                                                                                                                                                                                                                                             |
| GO:0051020 | GTPase binding                          | 6  | 1.1 | 1.2E-03 | P07900, P07814, Q13439, Q16849, P21333, A0A087WUZ3                                                                                                                                                                                                                                                                                                                                                                                             |
| GO:0003676 | nucleic acid binding                    | 49 | 8.6 | 2.0E-03 | Q15287, Q9H0D6, Q9UBB9, O75494, P31943, Q9GZT3, P18615, Q15424, Q9P2K5, Q13283, Q16629, B4DY08, Q96T37, O75554, Q13242, P09651, P18583, Q8TDD1, P49756, Q96T58, P17029, Q7Z6E9, Q9UKV3, A0A024RDB2, P19338, Q9NWH9, Q13595, Q86XP3, Q32P45, Q96KR1, Q9HC78, Q96JM3, Q14498, A0A0A0MT33, Q9UKJ3, A0A0A0MR66, O75643, Q96I25, A0A024R0Z3, Q8N8A6, P25490, J3KTL2, P52756, P07910, Q08170, A8MXP9, Q9GZR7, Q05519, Q14103, P43243, Q43719, Q01130 |
| GO:0019901 | protein kinase binding                  | 24 | 4.2 | 2.1E-03 | Q9NQT8, Q9UK58, Q9UEW8, Q8ND76, O94885, P18669, Q9UP95, Q13501, Q01484, Q15762, P21796, Q16555, A0A0G2JMX7, B7Z6G2, Q05193, P08238, P49023, Q8NFP9, O60716, P55011, P12036, P61266, P17600, P04792                                                                                                                                                                                                                                             |
| GO:0017166 | vinculin binding                        | 4  | 0.7 | 3.2E-03 | O15061, P49023, P35221, O60504                                                                                                                                                                                                                                                                                                                                                                                                                 |
| GO:0030506 | ankyrin binding                         | 5  | 0.9 | 3.2E-03 | Q15149, A0A087WUZ3, Q9C0C2, P11277, P02730                                                                                                                                                                                                                                                                                                                                                                                                     |
| GO:0008022 | protein C-terminus<br>binding           | 14 | 2.5 | 5.4E-03 | Q13131, O94812, P55196, Q05193, Q02880, A0A024R2C5, O94885, P08670, Q15036, Q6KC79, Q14676, P19338, O00505, Q9UN37                                                                                                                                                                                                                                                                                                                             |
| GO:0045296 | cadherin binding                        | 5  | 0.9 | 5.5E-03 | P18206, Q12955, O60716, P35221, Q92597                                                                                                                                                                                                                                                                                                                                                                                                         |
| GO:0032564 | dATP binding                            | 3  | 0.5 | 5.8E-03 | P07900, P08238, P50502                                                                                                                                                                                                                                                                                                                                                                                                                         |
| GO:0005484 | SNAP receptor<br>activity               | 6  | 1.1 | 7.4E-03 | O00161, P63027, Q16623, O75396, P61266, O75379                                                                                                                                                                                                                                                                                                                                                                                                 |

|            |                                                                       |    |      |         |                                                                                                                                                                                                                                                                                                                                                                                                                                                                                                                                                                    |
|------------|-----------------------------------------------------------------------|----|------|---------|--------------------------------------------------------------------------------------------------------------------------------------------------------------------------------------------------------------------------------------------------------------------------------------------------------------------------------------------------------------------------------------------------------------------------------------------------------------------------------------------------------------------------------------------------------------------|
| GO:0030911 | TPR domain binding                                                    | 3  | 0.5  | 9.4E-03 | P07900, P08238, Q9UNE7                                                                                                                                                                                                                                                                                                                                                                                                                                                                                                                                             |
| GO:0019899 | enzyme binding                                                        | 20 | 3.5  | 1.0E-02 | Q02880, Q92769, P17252, Q13185, P16157, P17096, Q9P035, Q9C0C2, Q01484, Q02156, Q13547, A0A0G2JMX7, Q9H7L9, P83916, Q9UKV3, O95292, P27708, Q9H4A6, Q9UNE7, P07948                                                                                                                                                                                                                                                                                                                                                                                                 |
| GO:0005524 | ATP binding                                                           | 64 | 11.2 | 1.2E-02 | P51531, Q9UEW8, Q15477, Q96T60, P52701, A0A0A0MS54, E9PDH4, A0A0U4BW16, Q02156, Q13283, Q9UQE7, Q00839, Q6P158, Q9P2D1, P15056, Q9NQ8T, Q02880, P21127, Q9NTI5, B7ZKY2, P23634, Q8TDD1, Q9BTU6, Q9H2G2, O43237, P35579, Q9NTI2, P35580, P08238, P17600, O95747, Q13627, Q9C0C9, Q9Y6G9, P34932, Q86XP3, P17252, Q32P45, Q2M2I8, Q9Y2W1, Q9NYV4, P07900, Q9BZC7, P27708, P49840, P35749, Q53EW6, P07948, Q13131, Q8NE71, A0A024R2C5, P46100, O75643, Q14839, A0A024R0Z3, Q8N8A6, P20020, Q9Y2Q0, Q9UN37, Q13085, P07814, Q92614, Q9GZR7, O94921, Q16513, A0A0A0MRM9 |
| GO:0005085 | guanyl-nucleotide exchange factor activity                            | 10 | 1.8  | 1.3E-02 | B7Z6G2, Q6IAA8, Q13144, Q96N67, Q9Y6D5, Q8N5V2, Q149N5, Q07889, Q9NZN5, O15085                                                                                                                                                                                                                                                                                                                                                                                                                                                                                     |
| GO:0003713 | transcription coactivator activity                                    | 16 | 2.8  | 1.3E-02 | P51531, O75151, Q5VTR2, Q8NFD5, P25490, Q86UE4, O96019, F8VXC8, Q9Y2W1, H0YBE0, P53999, Q92539, O43294, Q16514, Q92922, P29375, P29590                                                                                                                                                                                                                                                                                                                                                                                                                             |
| GO:0016810 | hydrolase activity, acting on carbon-nitrogen (but not peptide) bonds | 4  | 0.7  | 1.3E-02 | Q6DEN2, P27708, Q14194, Q16555                                                                                                                                                                                                                                                                                                                                                                                                                                                                                                                                     |
| GO:0050733 | RS domain binding                                                     | 3  | 0.5  | 1.4E-02 | P18583, O75494, J3KTL2                                                                                                                                                                                                                                                                                                                                                                                                                                                                                                                                             |
| GO:0016887 | ATPase activity                                                       | 13 | 2.3  | 1.4E-02 | Q9NQ8T, Q9UPN3, P51531, A0A024R2C5, Q8NE71, P52701, A0A0U4BW16, Q9UN37, P35579, P07900, Q96T23, Q9BZC7, Q9UKV3, Q92614                                                                                                                                                                                                                                                                                                                                                                                                                                             |
| GO:0005080 | protein kinase C binding                                              | 6  | 1.1  | 1.5E-02 | Q02880, P15924, P29966, Q13501, P04792, Q01130                                                                                                                                                                                                                                                                                                                                                                                                                                                                                                                     |

|            |                                                                 |    |      |         |                                                                                                                                                                                                                                                                                                                                                                                                                                                                                                                                                                                                |
|------------|-----------------------------------------------------------------|----|------|---------|------------------------------------------------------------------------------------------------------------------------------------------------------------------------------------------------------------------------------------------------------------------------------------------------------------------------------------------------------------------------------------------------------------------------------------------------------------------------------------------------------------------------------------------------------------------------------------------------|
| GO:0005096 | GTPase activator activity                                       | 17 | 3.0  | 1.7E-02 | D3DUW5, Q9ULH1, Q4KMP7, O43150, Q9P035, Q07960, Q149N5, C9JA93, Q9NZN5, Q07889, Q8IWW6, Q6GYQ0, O43166, Q6ZRI8, Q9Y2X7, P49407, O15085                                                                                                                                                                                                                                                                                                                                                                                                                                                         |
| GO:0000980 | RNA polymerase II distal enhancer sequence-specific DNA binding | 7  | 1.2  | 1.7E-02 | Q13547, P07910, Q92769, Q14839, B4DY08, Q92922, O96019, F8VXC8                                                                                                                                                                                                                                                                                                                                                                                                                                                                                                                                 |
| GO:0003677 | DNA binding                                                     | 69 | 12.1 | 2.0E-02 | Q12906, P23193, Q9UBB9, Q9NYF8, P82094, Q9NYB0, Q9P2K5, Q13283, Q8IXM2, Q9H307, P42166, Q92922, P08651, Q00839, Q02880, Q9NTI5, Q96ST2, P18583, Q5VZL5, Q96T58, P49450, Q15773, Q8NDX5, A0A0S2Z4Z6, Q07889, Q92522, Q9Y5B6, P05114, A0A140VKC4, Q96PU4, O95365, Q13207, Q496C9, Q8WYP5, O75376, Q32P45, O43823, Q8NFD5, Q96KR1, Q96FV9, F8VXC8, Q8TEA8, Q9HC78, Q9UKN8, Q12789, P53999, Q92945, P51858, P29375, Q7Z4V5, E9PRY8, Q08999, Q99996, Q9Y618, Q12888, P46100, Q14839, P17096, Q7Z6Z7, P25490, Q96KC8, P52756, P35659, Q9BXP5, Q9H2P0, P53805, Q16514, Q92614, Q13129, Q5SSJ5, P29590 |
| GO:0002162 | dystroglycan binding                                            | 3  | 0.5  | 3.1E-02 | P18206, O75122, P11137                                                                                                                                                                                                                                                                                                                                                                                                                                                                                                                                                                         |
| GO:0005522 | profilin binding                                                | 3  | 0.5  | 3.1E-02 | P42858, Q9Y6V0, Q14247                                                                                                                                                                                                                                                                                                                                                                                                                                                                                                                                                                         |
| GO:0003756 | protein disulfide isomerase activity                            | 4  | 0.7  | 3.1E-02 | Q15084, O00391, Q9H3N1, Q9H1E5                                                                                                                                                                                                                                                                                                                                                                                                                                                                                                                                                                 |
| GO:0019900 | kinase binding                                                  | 7  | 1.2  | 3.2E-02 | Q13131, P11166, Q16623, P08238, P42858, P21333, Q9UNE7                                                                                                                                                                                                                                                                                                                                                                                                                                                                                                                                         |
| GO:0019904 | protein domain specific binding                                 | 13 | 2.3  | 3.4E-02 | P80723, P31323, Q13185, Q9UDY2, A0A0U4BW16, Q9UN37, Q8WWN9, P35579, Q16623, A0A140VKC4, Q9UQN3, P50502, P22059, P61266                                                                                                                                                                                                                                                                                                                                                                                                                                                                         |
| GO:0048306 | calcium-dependent protein binding                               | 6  | 1.1  | 3.6E-02 | D6REX3, P63027, Q16623, O75131, P17600, P19634, O94979                                                                                                                                                                                                                                                                                                                                                                                                                                                                                                                                         |
| GO:0008134 | transcription factor binding                                    | 16 | 2.8  | 3.8E-02 | Q9H1E3, Q9Y618, Q92769, P35611, P21333, P17096, B4DR36, Q9Y5B6, Q13547, A0A140VKC4, P42858, C9JFV4, Q16514, Q16849, Q14103, P49407, O60504                                                                                                                                                                                                                                                                                                                                                                                                                                                     |
| GO:0003777 | microtubule motor                                               | 7  | 1.2  | 4.1E-02 | Q9NQT8, Q9Y6G9, Q9H0B6, O14576, O43237, Q9NSK0, Q9UQE7                                                                                                                                                                                                                                                                                                                                                                                                                                                                                                                                         |

|            |                        |   |     |         |                                                        |
|------------|------------------------|---|-----|---------|--------------------------------------------------------|
|            | activity               |   |     |         |                                                        |
| GO:0003690 | double-stranded DNA    | 7 | 1.2 | 4.3E-02 | Q96T60, Q9H1E3, Q9NWH9, Q15424, P52701, O43823, Q8ND56 |
|            | binding                |   |     |         |                                                        |
| GO:0003743 | translation initiation | 6 | 1.1 | 4.4E-02 | Q13144, B5ME19, Q9BY44, O60841, E7EX17, Q59GJ0, P23588 |
|            | factor activity        |   |     |         |                                                        |

---
