# Supplementary material for: Phosphorylation-Mediated Molecular Pathway Changes in Human Pituitary Neuroendocrine Tumors Identified by Quantitative Phosphoproteomics
Source: MDPI journal article supplement (doi:10.3390/cells10092225), 2021-08-27
Supplement: s1 [file s1]

**Table S4.** Statistically significant GO cellular components (CC) of differentially phosphorylated proteins in human nonfunctional PitNETs.

| ID         | Cellular components | Count | %    | PValue  | Genes                                                                                                                                                                                                                                                                                                                                                                                                                                                                                                                                                                                                                                                                                                                                                                                                                                                                                                                                                                                                                                                                                                                                                                                                                                                                                                                                                                                                                                                                                                                                                                                                                                                                                  |
|------------|---------------------|-------|------|---------|----------------------------------------------------------------------------------------------------------------------------------------------------------------------------------------------------------------------------------------------------------------------------------------------------------------------------------------------------------------------------------------------------------------------------------------------------------------------------------------------------------------------------------------------------------------------------------------------------------------------------------------------------------------------------------------------------------------------------------------------------------------------------------------------------------------------------------------------------------------------------------------------------------------------------------------------------------------------------------------------------------------------------------------------------------------------------------------------------------------------------------------------------------------------------------------------------------------------------------------------------------------------------------------------------------------------------------------------------------------------------------------------------------------------------------------------------------------------------------------------------------------------------------------------------------------------------------------------------------------------------------------------------------------------------------------|
| GO:0005654 | nucleoplasm         | 196   | 34.4 | 4.5E-33 | P23193, Q15477, Q13200, A0A0A0MS54, Q5H9R7, O75494, O95391, O43491, P55196, Q96T37, O75554, Q92922, Q00839, Q08J23, Q9NTI5, Q9BZZ5, O95251, Q7Z6E9, Q9UKV3, Q12996, Q15459, Q9UEY8, Q9Y4W2, Q9Y6G9, P17252, O75376, Q9UDY2, Q8NFD5, O75475, Q96FV9, F8VXC8, Q96B36, Q6PKG0, Q12789, P42858, Q13098, Q5VT52, Q9NVM9, Q8NE71, O43395, P35611, Q14839, Q29RF7, A0A024R0Z3, B4DR36, Q92504, P52756, Q96T23, Q9BXP5, Q08170, Q13439, Q01130, Q9Y3T9, O75151, A0A024R2M8, P31943, Q6PJT7, Q15424, Q04727, Q13427, P09651, P18583, P49756, O95218, Q5VTR2, Q8NDX5, P05114, Q96PU4, P19338, P25788, O95104, O95400, Q14694, Q9C0C2, Q13547, Q14498, O60832, P07900, Q9H7L9, P83916, Q6NZI2, Q08999, Q99502, Q6KC79, P17096, P52948, J3KTL2, P07910, C9JFV4, P43243, Q9UNE7, O43493, Q15287, Q12906, P51531, P52701, Q9NYB0, Q9UQ35, Q8N7H5, Q14137, Q16629, Q7Z5K2, Q9Y3E1, Q9H4A6, Q9UQE7, O00161, Q02880, Q5VZL5, Q9H1B7, Q14676, O00567, A0A0S2Z4Z6, Q96EZ8, P02545, P08238, Q16637, Q53GS9, P49407, Q8WYP5, Q9NWH9, Q9Y2F5, O43823, O00461, Q9Y2W1, Q9HC78, Q96JM3, Q9UKN8, A0A0A0MR66, P51858, Q9P2I0, Q8WVC0, Q14980, Q13131, Q9Y618, B3KUY2, Q86VM9, Q13501, A0A140VK92, Q02040, Q1KMD3, P49023, A8MXP9, Q5JVS0, P22059, Q92614, Q16514, Q53EL6, O75400, Q16513, O43719, A0A0A0MRM9, Q96T60, Q9H0D6, Q92769, Q9NYF8, Q96C24, P18615, Q9UNZ2, Q9P2K5, Q92625, B4DY08, Q9H307, Q8IXM2, Q13242, Q9NXG2, Q13895, Q96ST2, Q13247, Q96T58, P49450, Q9Y5J1, Q13627, Q8NEY8, Q86XP3, O75533, Q96KR1, Q16352, Q9NYV4, A0A0A0MT33, Q5T200, P27708, P61266, Q92945, P29375, O14579, Q9BWU0, Q12888, O75643, P19634, Q7Z6Z7, Q13367, O96019, O00505, P35659, Q05519, Q14103, Q9HCN4, P35658, P29590 |

|            |                        |     |      |         |                                                                                                                                                                                                                                                                                                                                                                                                                                                                                                                                                                                                                                                                                                                                                                                                                                                                                                                                                                                                                                                                                                                                                                                                                                                                                                                                                                                                                                                                                                                                                                                                                |
|------------|------------------------|-----|------|---------|----------------------------------------------------------------------------------------------------------------------------------------------------------------------------------------------------------------------------------------------------------------------------------------------------------------------------------------------------------------------------------------------------------------------------------------------------------------------------------------------------------------------------------------------------------------------------------------------------------------------------------------------------------------------------------------------------------------------------------------------------------------------------------------------------------------------------------------------------------------------------------------------------------------------------------------------------------------------------------------------------------------------------------------------------------------------------------------------------------------------------------------------------------------------------------------------------------------------------------------------------------------------------------------------------------------------------------------------------------------------------------------------------------------------------------------------------------------------------------------------------------------------------------------------------------------------------------------------------------------|
| GO:0005829 | cytosol                | 184 | 32.3 | 1.6E-18 | Q15287, Q13200, Q13144, A0A0A0MS54, Q5H9R7, Q4KMP7, O75494, P82094, A0A0U4BW16, O43847, O60291, Q4VCS5, P55196, B7Z6G2, D6REX3, Q16623, Q5JSH3, O15027, Q13283, P49792, O60716, P50502, Q92539, Q7Z5K2, Q9Y3E1, Q9UQE7, Q9H4A6, O60504, P15056, D3DUW5, Q9NTI5, Q02880, P18669, E7EX17, A0A024R098, A0A0S2Z4Z6, P11277, Q07889, A0A140VKC4, Q7Z6E9, Q15149, P02545, Q9UKV3, P08238, Q16637, O75131, Q8N5V2, Q8WYP5, P49407, Q9UEY8, P34932, P18206, P17252, Q32P45, P16157, P35606, Q9UDY2, O60271, Q15121, Q6PCE3, O75475, Q9NZN5, O94979, Q8WWN9, Q96B36, P42858, O75122, Q14980, P07948, E9PRY8, Q13131, Q5JWF2, Q99996, Q8NE71, P60174, P05387, Q9ULH1, Q9UPQ9, P35612, P35611, P05388, B3KUY2, Q29RF7, Q13501, Q99442, Q59GJ0, Q641Q2, Q13085, P07814, Q6DEN2, P49023, Q13439, Q9UQN3, Q5JVS0, P22059, A0A024RAN2, Q53EL6, Q16513, Q92597, O15085, P26232, Q9NR45, Q06210, Q9UEW8, A0A087WUZ3, P35221, E9PDH4, Q01484, Q02156, P11166, Q9UNZ2, O75061, Q02410, Q9Y2H6, Q15036, Q9Y2X7, B4DY08, Q14194, Q13895, Q9NQT8, Q9H4G0, B7ZKY2, Q08495, P21333, P49450, Q9BTU6, O43237, Q07960, Q9Y4F1, Q9Y5B6, P35579, Q13813, P01185, A0A0G2JMX7, P35580, Q12955, P16949, O60841, A0A024RDB2, Q8NFP9, P17600, E7EX44, P24534, P04792, P46821, Q9C0C9, O94874, P25788, P49585, Q9H0B6, Q9C0C2, P68871, P23588, Q16555, Q13547, Q8IWW6, P07900, P08670, Q09666, P27708, P61266, O14576, Q92945, Q6ZRI8, P49840, O43765, Q53EW6, P35749, O14579, P63027, Q6NZI2, A0A024R2C5, P31323, Q9Y6D5, P17096, Q7Z6Z7, Q149N5, Q96KC8, O00505, P52948, Q9UN37, O60763, P07910, Q14103, O94921, P35658, Q9UNE7, O43493, P29590 |
| GO:0016607 | nuclear speck          | 37  | 6.5  | 3.4E-18 | Q15287, Q9UK58, P80723, Q66PJ3, Q86XP3, Q9UBB9, O95400, Q9NYF8, O75533, O75494, O95391, Q9UQ35, Q96FV9, Q9Y2W1, Q9NYV4, Q14498, Q5T200, Q9H0G5, Q6PJT7, Q96T37, O75554, Q9H307, Q6PD62, Q13427, P18583, O43395, Q13247, P49756, A0A0S2Z4Z6, J3KTL2, P02545, Q02040, Q9UKV3, Q08170, O75400, Q13627, Q01130                                                                                                                                                                                                                                                                                                                                                                                                                                                                                                                                                                                                                                                                                                                                                                                                                                                                                                                                                                                                                                                                                                                                                                                                                                                                                                     |
| GO:0005913 | cell adherens junction | 42  | 7.4  | 5.4E-15 | Q9UHB6, Q9UPN3, P18206, Q9H0B6, A0A087WUZ3, A0A0U4BW16, Q9UDY2, P35221, A0A024R1S8, Q9C0C2, Q15762, P55196, Q6PKG0, Q09666, O60716, C9J6P4, P42166, A0A024R4E5, P07948, E9PRY8, Q9H4G0, Q9ULH1, P35611, Q9H2G2, P21333, Q07960, O00567, Q92522, P35579, Q13813,                                                                                                                                                                                                                                                                                                                                                                                                                                                                                                                                                                                                                                                                                                                                                                                                                                                                                                                                                                                                                                                                                                                                                                                                                                                                                                                                                |

Q15149, O60763, P08238, O95292, Q9UQN3, Q9BY44, A0A024RAN2, Q16513, O76021, E7EX44, Q92597, P26232, Q14247

|            |           |     |      |         |                                                                                                                                                                                                                                                                                                                                                                                                                                                                                                                                                                                                                                                                                                                                                                                                                                                                                                                                                                                                                                                                                                                                                                                                                                                                                                                                                                                                                                                                                                                                                                                                                                                                                                                                                                                                                                                                                                                                                                                                                                                        |
|------------|-----------|-----|------|---------|--------------------------------------------------------------------------------------------------------------------------------------------------------------------------------------------------------------------------------------------------------------------------------------------------------------------------------------------------------------------------------------------------------------------------------------------------------------------------------------------------------------------------------------------------------------------------------------------------------------------------------------------------------------------------------------------------------------------------------------------------------------------------------------------------------------------------------------------------------------------------------------------------------------------------------------------------------------------------------------------------------------------------------------------------------------------------------------------------------------------------------------------------------------------------------------------------------------------------------------------------------------------------------------------------------------------------------------------------------------------------------------------------------------------------------------------------------------------------------------------------------------------------------------------------------------------------------------------------------------------------------------------------------------------------------------------------------------------------------------------------------------------------------------------------------------------------------------------------------------------------------------------------------------------------------------------------------------------------------------------------------------------------------------------------------|
| GO:0005737 | cytoplasm | 241 | 42.4 | 1.0E-14 | <p>Q9BVG4, Q5H9R7, O75494, O95391, P27816, P11137, A0A0U4BW16, Q9BUT9, O43491, P55196, H0YBE0, O60716, P50502, O43294, Q08J23, Q9BZZ5, Q8ND56, O95251, Q9UKV3, Q9BZH6, Q9UEY8, Q9Y4W2, Q9Y6G9, P17252, Q2M2I8, P16157, Q9UDY2, Q8NFD5, Q96FV9, Q9NZN5, Q8TEA8, Q96B36, Q6PKG0, P42858, Q13098, C9J6P4, Q02952, Q9NVM9, P07948, Q8WUY3, O43395, Q8NE71, P78559, Q8WX93, Q14839, B4DR36, Q9P035, Q13085, P07814, Q9BXP5, Q13439, Q9UQN3, P53805, O15085, Q9NR45, Q9Y3T9, Q9UEW8, O75151, P28290, A0A024R2M8, P31943, Q6PJT7, Q15036, P42166, Q13425, Q13428, Q13427, Q14194, P09651, A0A024R4E5, Q9NQT8, P21127, B7ZKY2, P49756, Q13107, P21333, Q9H2G2, Q07960, Q9Y4F1, Q15773, Q3KQU3, A0A0G2JMX7, P05114, O60841, O95747, O60941, P24534, P04792, P27105, Q9C0C9, O94874, P25788, O95400, Q14694, Q9C0C2, A0A0D9SF30, Q13547, O60832, P07900, Q9H7L9, P08670, Q09666, O43765, Q6NZI2, Q08999, Q9H1E3, P31323, Q99502, Q9NSK0, J3KTL2, Q9UN37, Q15435, C9JFV4, Q9Y3D3, Q9UNE7, Q15287, Q12906, Q9UPN3, Q08AD1, Q13144, P52701, Q9NYB0, O60291, Q4VCS5, Q8N7H5, D6REX3, O15027, Q14137, Q13283, Q16629, Q7Z5K2, Q9UQE7, Q9P2G1, P15056, O00161, D3DUW5, Q02880, Q5VZL5, P18669, O00567, P11277, Q96EZ8, Q15149, P02545, P08238, Q16637, O75131, P49407, Q9UHB6, Q9H2U2, P80723, Q32P45, O60271, P49006, Q9Y4G6, Q9UPT6, A0A024R1S8, O94979, Q8WWN9, P01189, Q96JM3, P48681, O75122, P51858, Q14980, E9PRY8, Q5JWF2, Q13131, Q8IV36, Q6ZTN6, P05388, B3KUY2, Q9UPU5, Q13501, Q14157, Q641Q2, Q02040, Q6DEN2, P49023, Q5JVS0, P12036, P22059, A0A024RAN2, Q7Z5L9, Q53EL6, O75400, Q16513, Q92597, Q14247, P26232, A0A0A0MRM9, Q92769, Q9UBB9, Q9NYF8, Q96C24, A0A087WUZ3, L0R530, P11171, Q02156, A0A024QZ15, Q9UNZ2, Q6GYQ0, Q9P2K5, Q92625, Q9Y2X7, Q8IXM2, O95359, Q13895, Q9H4G0, Q9BSQ5, P15924, P35579, P35580, O95292, P16949, A0A024RDB2, Q9BY44, Q9HBL0, Q8NEY8, Q496C9, P46821, P07359, Q86XP3, O95671, Q96KR1, Q16555, Q9Y2J2, P61266, O14576, P29375, Q8WXX5, Q9BWU0, A0A024R2C5, Q96K21, Q12888, P19634, P25490, Q86UE4, Q7Z6Z7, Q13367,</p> |
|------------|-----------|-----|------|---------|--------------------------------------------------------------------------------------------------------------------------------------------------------------------------------------------------------------------------------------------------------------------------------------------------------------------------------------------------------------------------------------------------------------------------------------------------------------------------------------------------------------------------------------------------------------------------------------------------------------------------------------------------------------------------------------------------------------------------------------------------------------------------------------------------------------------------------------------------------------------------------------------------------------------------------------------------------------------------------------------------------------------------------------------------------------------------------------------------------------------------------------------------------------------------------------------------------------------------------------------------------------------------------------------------------------------------------------------------------------------------------------------------------------------------------------------------------------------------------------------------------------------------------------------------------------------------------------------------------------------------------------------------------------------------------------------------------------------------------------------------------------------------------------------------------------------------------------------------------------------------------------------------------------------------------------------------------------------------------------------------------------------------------------------------------|

|            |         |     |      |         |                                                                                                                                                                                                                                                                                                                                                                                                                                                                                                                                                                                                                                                                                                                                                                                                                                                                                                                                                                                                                                                                                                                                                                                                                                                                                                                                                                                                                                                                                                                                                                                                                                                                                                                                                                                                                                                                                                                                                                                                                                                                                                 |
|------------|---------|-----|------|---------|-------------------------------------------------------------------------------------------------------------------------------------------------------------------------------------------------------------------------------------------------------------------------------------------------------------------------------------------------------------------------------------------------------------------------------------------------------------------------------------------------------------------------------------------------------------------------------------------------------------------------------------------------------------------------------------------------------------------------------------------------------------------------------------------------------------------------------------------------------------------------------------------------------------------------------------------------------------------------------------------------------------------------------------------------------------------------------------------------------------------------------------------------------------------------------------------------------------------------------------------------------------------------------------------------------------------------------------------------------------------------------------------------------------------------------------------------------------------------------------------------------------------------------------------------------------------------------------------------------------------------------------------------------------------------------------------------------------------------------------------------------------------------------------------------------------------------------------------------------------------------------------------------------------------------------------------------------------------------------------------------------------------------------------------------------------------------------------------------|
|            |         |     |      |         | O00505, C9JA93, O43166, Q9H2P0, O94921, Q9HCN4, P29590                                                                                                                                                                                                                                                                                                                                                                                                                                                                                                                                                                                                                                                                                                                                                                                                                                                                                                                                                                                                                                                                                                                                                                                                                                                                                                                                                                                                                                                                                                                                                                                                                                                                                                                                                                                                                                                                                                                                                                                                                                          |
| GO:0005634 | nucleus | 239 | 42.0 | 2.8E-12 | <p> P23193, Q9UK58, Q15477, Q13200, Q96TC7, Q5JTV8, O75494, O95391, P82094, P85037, A0A0U4BW16, Q9BUT9, O43491, H0YBE0, O60716, Q92539, Q00839, O60504, Q9P2D1, Q08J23, Q9NTI5, Q9BZZ5, O95251, Q92522, Q7Z6E9, Q969E4, A0A140VKC4, Q9UKV3, Q9BZH6, Q13207, Q12996, Q9UK76, Q13595, O75376, P16157, O75475, Q96FV9, Q8TEA8, Q12789, P42858, C9J6P4, Q16849, Q7Z4V5, Q9NVM9, P07948, O43395, A0A090J7P6, P35611, Q8WX93, Q29RF7, Q14839, A0A024R0Z3, P20020, B4DR36, P52756, Q96T23, Q08170, Q9UQN3, P53805, Q01130, Q9Y3T9, Q9UEW8, Q9H6F5, O75151, P28290, A0A024R2M8, P31943, Q9BXX5, Q6PJT7, Q15424, Q04727, P42166, Q13428, P08651, Q13427, P09651, Q6P158, A0A024R4E5, P21127, Q13107, Q5VTR2, O95218, P21333, Q15773, Q8NDX5, Q9Y5B6, P05114, O60841, Q96PU4, Q9HCD5, P24534, P04792, P19338, Q9C0C9, O94874, P25788, Q8WUB8, O95400, Q14694, Q9C0C2, Q13547, Q14498, O60832, P07900, Q9H7L9, P83916, Q09666, O43765, Q6NZI2, Q08999, Q9H1E3, Q8ND76, Q99502, Q6KC79, P17096, J3KTL2, Q9UN37, Q15435, P07910, C9JFV4, P43243, Q15287, Q12906, P51531, Q13144, Q9NYB0, O60291, Q14137, P05455, Q13283, Q16629, Q7Z5K2, Q9Y3E1, Q9UQE7, P15056, Q02880, Q9H1B7, Q8TDD1, Q14676, Q3KNV8, A0A0S2Z4Z6, Q96EZ8, Q92733, P02545, P08238, Q16637, O75131, Q8WYP5, Q8WWQ0, P49407, P80723, Q9NWH9, Q32P45, P45880, O43823, Q9Y2W1, Q9HC78, Q96JM3, Q9H0G5, A0A0A0MR66, P53999, Q9UPA5, Q14980, E9PRY8, Q5JWF2, Q13131, P60174, Q9Y618, P05388, B3KUY2, Q02040, Q1KMD3, A8MXP9, Q5JVS0, P22059, Q13129, Q7Z5L9, Q53EL6, Q16513, O43719, Q92597, Q5SSJ5, P26232, Q96T60, Q66PJ3, Q9H0D6, Q92769, Q9NYF8, Q13185, A0A087WUZ3, L0R530, P11171, Q9GZT3, Q02156, P18615, P21796, Q9UNZ2, Q6GYQ0, Q9P2K5, Q02410, B4DY08, O95359, Q13895, Q96ST2, P15924, Q9BWW4, Q96T58, P49450, P17029, Q9Y5J1, P35579, P35580, O95365, Q13627, Q9NVU7, Q496C9, Q9BW71, Q9BRD0, Q86XP3, O75533, Q9NYV4, P27708, P61266, O14576, P29375, Q6IPX3, Q8WXX5, Q9BWU0, Q9NPJ4, A0A024R2C5, Q12888, P46100, O75643, P25490, Q86UE4, Q7Z6Z7, O96019, Q96KC8, O00505, P35659, Q9H2P0, Q05519, Q14103, O94921, P35658, P29590 </p> |

|            |                |     |      |         |                                                                                                                                                                                                                                                                                                                                                                                                                                                                                                                                                                                                                                                                                                                                                                                                                                                                                                                                                                                                                    |
|------------|----------------|-----|------|---------|--------------------------------------------------------------------------------------------------------------------------------------------------------------------------------------------------------------------------------------------------------------------------------------------------------------------------------------------------------------------------------------------------------------------------------------------------------------------------------------------------------------------------------------------------------------------------------------------------------------------------------------------------------------------------------------------------------------------------------------------------------------------------------------------------------------------------------------------------------------------------------------------------------------------------------------------------------------------------------------------------------------------|
| GO:0005730 | nucleolus      | 64  | 11.2 | 4.3E-11 | Q12906, P23193, Q9Y3T9, Q96T60, Q9H6F5, Q66PJ3, Q9H0D6, O75151, Q9UBB9, Q9NYF8, A0A024R2M8, A0A087WUZ3, P11137, L0R530, H0YBE0, Q6PJT7, Q9H3N1, Q14137, Q13428, P08651, Q13242, O95359, Q9P2D1, Q13895, Q02880, Q08J23, B7ZKY2, Q8TDD1, Q5VTR2, P21333, O95251, O00567, Q92522, Q9Y5J1, Q96EZ8, Q7Z6E9, Q9UKV3, Q9NVU7, P19338, Q9UK76, Q9BW71, Q9Y4W2, Q13595, O43823, Q9NYV4, O60832, Q12789, P53999, O00264, P29375, Q8WVC0, E9PRY8, Q08999, A0A024R0Z3, Q8N8A6, B4DR36, Q86UE4, Q641Q2, O60763, Q13085, C9JFV4, P22059, Q9GZR7, O76021, P29590, A0A0A0MRM9                                                                                                                                                                                                                                                                                                                                                                                                                                                     |
| GO:0005925 | focal adhesion | 39  | 6.9  | 2.0E-10 | Q9UHB6, P18206, Q96N67, Q32P45, P35221, A0A0U4BW16, Q9Y4G6, A0A024R1S8, O43491, B7Z6G2, Q13283, P08670, Q09666, O43294, O75122, P29966, Q9Y2X7, Q13425, Q02952, O60504, O00161, Q0ZGT2, B7ZKY2, P05387, P35611, Q8WX93, P05388, P21333, P19634, Q14676, P17096, Q9P035, P35579, Q15149, P24821, P49023, O75131, Q9HBL0, P04792, P35658, Q14247                                                                                                                                                                                                                                                                                                                                                                                                                                                                                                                                                                                                                                                                     |
| GO:0016020 | membrane       | 117 | 20.6 | 6.0E-10 | Q12906, Q13200, O00203, O95391, A0A0U4BW16, O60291, P56730, Q8N7H5, P49792, P55011, O75694, O15320, Q00839, D3DUW5, P23634, P18669, Q9BZZ5, Q8TDD1, O00567, P08238, Q8TBA6, Q9BZH6, Q6ZSS7, Q8NC56, Q8N5V2, O60486, Q9Y4W2, Q9UEY8, Q9Y6G9, Q9UP95, O75376, O43823, Q9NZN5, Q14168, O00461, Q6PKG0, Q12789, O75122, O00264, Q9Y6V0, Q9P2I0, Q8TCJ2, Q5JWF2, Q8NE71, P27824, Q9ULH1, P05387, Q9Y618, P05388, Q14839, Q8N8A6, Q99442, P20020, B4DR36, P02724, Q92504, P07814, Q1KMD3, A8MXP9, A0A024RAN2, Q92614, P22059, Q9GZR7, O75400, O15085, Q96T60, Q9H0D6, Q14571, Q96C24, P31943, P21796, P11166, Q02410, Q9Y2H6, Q15036, Q9Y2X7, B4DY08, P42166, Q9H307, Q13425, Q5T1M5, P09651, O15173, Q13895, Q9BTU6, P21333, O43237, Q15773, P35579, Q13813, P24821, P16949, P19338, P07359, P27105, O94874, Q86XP3, Q9H0B6, O95674, A0A0D9SF30, Q16555, P07900, Q9BZC7, P27708, Q09666, Q92945, P61266, O43765, P63027, O75643, Q9Y6D5, Q7Z6Z7, Q9Y2Q0, Q149N5, Q96KC8, O60763, O75396, P07910, C9JFV4, O76021, P43243 |

|            |                                         |    |     |         |                                                                                                                                                                                                                                                                                                                        |
|------------|-----------------------------------------|----|-----|---------|------------------------------------------------------------------------------------------------------------------------------------------------------------------------------------------------------------------------------------------------------------------------------------------------------------------------|
| GO:0005681 | spliceosomal complex                    | 18 | 3.2 | 2.5E-09 | O43395, O75643, Q9UBB9, P49756, Q9BZZ5, O75533, Q96I25, O95391, P52756, Q92733, A0A0A0MT33, Q02040, P07910, O75554, B4DY08, Q53GS9, Q15459, P09651, Q01130                                                                                                                                                             |
| GO:0043234 | protein complex                         | 36 | 6.3 | 3.4E-08 | O94874, P18206, Q92769, Q9H0B6, A0A087WUZ3, Q14694, A0A0U4BW16, P11171, F8VXC8, Q16555, Q13547, B7Z6G2, Q96B36, P07900, P42858, P27708, P50502, Q15036, B4DY08, Q92922, Q13425, D3DUW5, Q6NZI2, O43395, P27824, Q9BSQ5, O94885, P23634, Q9BWW4, Q99502, Q14839, Q9BTU6, Q96I25, O96019, P11277, P35579, P07910, Q16513 |
| GO:0005856 | cytoskeleton                            | 33 | 5.8 | 9.4E-08 | Q9UEY8, P27105, Q9UPN3, P80723, Q9UEW8, P18206, P16157, P11171, Q9C0C2, Q01484, Q02156, Q16555, O43491, P08670, Q9Y2J2, O43294, Q9Y6V0, Q02952, O60504, Q9H4G0, Q0ZGT2, Q99996, P15924, P35612, P35611, Q9Y4F1, Q15149, O43166, P49023, Q9HBL0, E7EX44, P04792, Q14247                                                 |
| GO:0016363 | nuclear matrix                          | 16 | 2.8 | 1.9E-07 | Q9Y618, B7ZKY2, O43823, P25490, Q96FV9, A0A0S2Z4Z6, A0A0A0MT33, A8MXP9, P27708, O43294, O75400, Q13427, P43243, Q9UQE7, Q8WYP5, Q14980, P29590                                                                                                                                                                         |
| GO:0000785 | chromatin                               | 15 | 2.6 | 3.9E-07 | Q9NTI5, Q9H1E3, Q9Y618, Q29RF7, Q13185, Q6KC79, P17096, Q13547, P05114, P83916, P42166, Q7Z5K2, Q9UQE7, P49407, Q8WYP5                                                                                                                                                                                                 |
| GO:0014731 | spectrin-associated cytoskeleton        | 6  | 1.1 | 1.2E-06 | Q12955, Q08495, P16157, A0A087WUZ3, P11171, P11277                                                                                                                                                                                                                                                                     |
| GO:0030529 | intracellular ribonucleoprotein complex | 17 | 3.0 | 3.3E-06 | Q12906, O75643, P05388, Q32P45, Q9GZT3, P07814, P07910, Q9H0G5, Q13283, P05455, Q12789, Q14137, A0A024RDB2, B4DY08, Q13627, Q14103, Q00839, P09651, P19338                                                                                                                                                             |

|            |                                             |    |     |         |                                                                                                                                                                                                                                                                                                                                                                                                            |
|------------|---------------------------------------------|----|-----|---------|------------------------------------------------------------------------------------------------------------------------------------------------------------------------------------------------------------------------------------------------------------------------------------------------------------------------------------------------------------------------------------------------------------|
| GO:0071013 | catalytic step 2<br>spliceosome             | 14 | 2.5 | 3.6E-06 | O75643, Q9UBB9, O75533, O95391, A0A024R0Z3, Q9UQ35, P31943, A0A0S2Z4Z6, J3KTL2, P07910, Q9H307, B4DY08, Q00839, Q15459, P09651                                                                                                                                                                                                                                                                             |
| GO:0014069 | postsynaptic<br>density                     | 19 | 3.3 | 1.1E-05 | Q9UEY8, Q9UQ16, P35612, Q08495, A0A087WUZ3, P27816, Q07889, A0A0G2JMX7, O43166, O75061, Q9Y2J2, P12036, P17600, Q9Y6V0, Q9UPA5, P46821, P49407, P07948, P26232                                                                                                                                                                                                                                             |
| GO:0005794 | Golgi<br>apparatus                          | 49 | 8.6 | 3.0E-05 | Q9UPN3, P52701, O00203, Q8TBE7, P82094, P35221, P22466, Q02156, Q5JSH3, O15027, O00391, Q02410, Q9Y2H6, Q15036, Q9H4A6, D3DUW5, Q9BTU6, Q9NTI2, Q12955, O95292, Q8TBA6, P17600, Q8NEY8, Q6IAA8, Q9UQ16, O43823, O75379, O00461, Q05193, P42858, C9J6P4, O75122, Q16849, Q9NQQ7, O14579, P07948, Q8IV36, Q99996, Q8WXF7, Q13367, Q9Y2Q0, Q92504, A0A140VK92, O60763, Q13439, Q92614, P22059, Q14247, O43493 |
| GO:0005875 | microtubule<br>associated<br>complex        | 8  | 1.4 | 5.6E-05 | A0A0G2JMX7, P78559, P49023, P49792, P11137, P27816, Q15121, P46821                                                                                                                                                                                                                                                                                                                                         |
| GO:0030141 | secretory<br>granule                        | 11 | 1.9 | 7.0E-05 | P10645, P63027, Q16623, P05060, C9J650, P05408, Q96C24, Q16849, P13521, P22466, P01189, P01185                                                                                                                                                                                                                                                                                                             |
| GO:0036464 | cytoplasmic<br>ribonucleoprotein<br>granule | 7  | 1.2 | 7.7E-05 | A0A0G2JMX7, Q16637, P05388, O14576, Q00839, P19338, Q16352                                                                                                                                                                                                                                                                                                                                                 |
| GO:0005938 | cell cortex                                 | 14 | 2.5 | 8.4E-05 | Q9UEY8, P02671, Q14571, P02675, B7Z6G2, P35580, P49023, Q5TBA9, O75122, P29966, Q02952, Q14980, P19338, Q14247                                                                                                                                                                                                                                                                                             |
| GO:0008091 | spectrin                                    | 5  | 0.9 | 9.0E-05 | A0A087WUZ3, P11171, P11277, O43491, Q13813                                                                                                                                                                                                                                                                                                                                                                 |
| GO:0043005 | neuron<br>projection                        | 20 | 3.5 | 1.0E-04 | P63027, O00161, O94874, P23634, Q96N67, Q9BTU6, P27816, P11137, Q01484, Q13547, B7Z6G2, Q16623, P07900, Q12955, P16949, Q02410, Q16637, P08670, Q92625, P15056                                                                                                                                                                                                                                             |

|            |                                          |    |     |         |                                                                                                                                                                                    |
|------------|------------------------------------------|----|-----|---------|------------------------------------------------------------------------------------------------------------------------------------------------------------------------------------|
| GO:0015629 | actin<br>cytoskeleton                    | 19 | 3.3 | 1.1E-04 | Q9UHB6, P18206, B7ZKY2, Q8WX93, Q08495, P21333, A0A0U4BW16, P35221, Q9Y4G6, P11277, Q8NDX5, P35579, Q96EZ8, P35580, Q13085, Q09666, Q9HCD5, P29966, E7EX44, P26232                 |
| GO:0045111 | intermediate<br>filament<br>cytoskeleton | 9  | 1.6 | 1.5E-04 | P51531, P48681, Q15149, Q9UNZ2, P08670, Q99442, Q16513, Q16352, Q9UNE7                                                                                                             |
| GO:0043034 | costamere                                | 6  | 1.1 | 2.0E-04 | O15061, Q15149, P18206, Q12955, Q09666, Q01484                                                                                                                                     |
| GO:0043197 | dendritic spine                          | 12 | 2.1 | 2.0E-04 | P35580, P27824, O43166, P31323, Q9UQ16, Q9ULH1, O60716, Q9Y6D5, Q9Y4F1, P49407, P46821, Q14247                                                                                     |
| GO:0005694 | chromosome                               | 12 | 2.1 | 3.1E-04 | Q7Z6E9, Q9NTI5, Q15435, Q9UNZ2, Q7Z5K2, Q29RF7, Q14676, Q96KR1, Q9UQE7, Q8NEY8, Q5SSJ5, Q14980                                                                                     |
| GO:0071564 | npBAF<br>complex                         | 5  | 0.9 | 3.3E-04 | P51531, Q8WUB8, Q92922, O96019, F8VXC8                                                                                                                                             |
| GO:0030863 | cortical<br>cytoskeleton                 | 6  | 1.1 | 4.1E-04 | Q08495, P21333, A0A0U4BW16, P11171, P35579, P02730, Q14247                                                                                                                         |
| GO:0008021 | synaptic<br>vesicle                      | 11 | 1.9 | 4.3E-04 | P63027, Q05193, Q16623, A0A0A0MS29, Q96A57, Q02410, P61266, P45880, P17600, Q16849, P21796                                                                                         |
| GO:0005874 | microtubule                              | 22 | 3.9 | 4.9E-04 | D3DUW5, Q9NQ8T, Q9UPN3, Q9Y6G9, Q96TC7, Q08AD1, Q9UQ16, P78559, Q9H0B6, P27816, P11137, O43237, Q9NSK0, Q16555, A0A0G2JMX7, Q05193, P16949, O75122, O14576, Q13425, Q92597, P46821 |
| GO:0008180 | COP9<br>signalosome                      | 7  | 1.2 | 5.5E-04 | P80723, P08238, Q13098, Q96N67, A0A0U4BW16, Q4VCS5, P35579, O43491                                                                                                                 |



|            |                                       |     |      |         |                                                                                                                                                                                                                                                                                                                                                                                                                                                                                                                                                                                                                                                                                                                                                                                                                                                                                                                                                                                                    |
|------------|---------------------------------------|-----|------|---------|----------------------------------------------------------------------------------------------------------------------------------------------------------------------------------------------------------------------------------------------------------------------------------------------------------------------------------------------------------------------------------------------------------------------------------------------------------------------------------------------------------------------------------------------------------------------------------------------------------------------------------------------------------------------------------------------------------------------------------------------------------------------------------------------------------------------------------------------------------------------------------------------------------------------------------------------------------------------------------------------------|
| GO:0070062 | extracellular<br>exosome              | 114 | 20.0 | 5.5E-04 | Q13200, B2RUZ4, A0A0A0MS54, P27816, A0A0U4BW16, O60291, P02730, O43491, O60716, P50502, P55011, Q16629, O00161, P18669, Q15149, P08238, O75131, Q8WWQ0, Q8WYP5, Q9H2U2, P34932, P80723, P18206, Q9UQ16, P17252, P45880, O60271, P49006, Q9NZN5, A0A024R1S8, Q9Y2W1, Q05193, P53999, P01008, O00264, Q9Y6V0, Q14980, P07948, Q8IV36, Q5JWF2, P02671, P27824, P60174, P05387, B3KUY2, P05388, A0A024R0Z3, Q13501, P20020, P02724, A0A140VK92, Q15084, Q13085, Q13439, Q9UQN3, Q92597, Q01130, Q14247, Q9NR45, Q06210, A0A024R2M8, A0A087WUZ3, P21796, P11166, O00391, B4DY08, Q13425, P09651, P15924, P01042, P02675, Q96T58, Q9H2G2, P21333, Q07960, P35579, Q13813, P35580, B7Z351, Q9NRX5, P16949, O95747, P19338, P04792, P07359, Q6IAA8, P27105, P02751, P25788, P68871, A0A0D9SF30, Q16555, P07900, P08670, P27708, Q09666, P29966, P35749, P63027, Q08999, A0A024R2C5, Q8ND76, P31323, P02765, Q6KC79, P19634, Q7Z6Z7, Q9Y2Q0, C9JA93, Q9UN37, J3KTL2, Q14515, Q15435, P07910, Q14103, Q9UNE7 |
| GO:0030133 | transport<br>vesicle                  | 11  | 1.9  | 5.6E-04 | Q5JWF2, O75396, O60763, Q8TBA6, P35606, O75379, O15240, O14579, O43493, A0A140VK92, O00461                                                                                                                                                                                                                                                                                                                                                                                                                                                                                                                                                                                                                                                                                                                                                                                                                                                                                                         |
| GO:0016514 | SWI/SNF<br>complex                    | 5   | 0.9  | 8.4E-04 | P51531, Q92922, Q8NFD5, O96019, F8VXC8                                                                                                                                                                                                                                                                                                                                                                                                                                                                                                                                                                                                                                                                                                                                                                                                                                                                                                                                                             |
| GO:0016323 | basolateral<br>plasma<br>membrane     | 15  | 2.6  | 1.1E-03 | Q9UEW8, P15924, B7ZKY2, P23634, P16157, P19634, P20020, Q01484, P02730, P11166, P07900, Q12955, P08238, P49407, P26232                                                                                                                                                                                                                                                                                                                                                                                                                                                                                                                                                                                                                                                                                                                                                                                                                                                                             |
| GO:0048471 | perinuclear<br>region of<br>cytoplasm | 34  | 6.0  | 1.1E-03 | P10645, P27105, Q9UQ16, P17252, A0A0A0MS54, E9PDH4, O60271, Q9GZT3, O94979, Q02156, D6REX3, Q13547, H0YBE0, P07900, Q5JSH3, Q02410, O14576, P07948, D3DUW5, Q5JWF2, P63027, P31323, Q08495, Q9Y6D5, Q9H2G2, P21333, P19634, Q86UE4, Q07960, Q9UN37, B7Z351, O60763, P02545, P22059, Q16513, Q92597                                                                                                                                                                                                                                                                                                                                                                                                                                                                                                                                                                                                                                                                                                 |

|            |                                          |    |     |         |                                                                                                                                                                                                                                                            |
|------------|------------------------------------------|----|-----|---------|------------------------------------------------------------------------------------------------------------------------------------------------------------------------------------------------------------------------------------------------------------|
| GO:0030054 | cell junction                            | 27 | 4.7 | 1.6E-03 | F5H7N0, P80723, Q9UDY2, P35221, P11171, Q8N7H5, O43491, P55196, Q16623, Q16849, Q9Y6V0, Q9UPA5, P63027, D3DUW5, Q96A57, P15924, Q9Y6D5, Q9BTU6, Q9Y4F1, Q96EZ8, A0A0A0MS29, O43166, O75131, P22059, P17600, Q16513, P46821                                 |
| GO:0005911 | cell-cell junction                       | 14 | 2.5 | 2.1E-03 | P11166, O00161, P55196, Q9UEY8, Q9H4G0, P18206, B7ZKY2, O60716, Q9Y2J2, Q9H307, P21333, E9PDH4, P35221, Q9Y4G6                                                                                                                                             |
| GO:0030426 | growth cone                              | 11 | 1.9 | 2.6E-03 | A0A0G2JMX7, P35580, P80723, Q6DEN2, Q8WX93, O60716, Q96N67, Q8N5V2, Q5T1M5, Q16555, Q14247                                                                                                                                                                 |
| GO:0005802 | trans-Golgi network                      | 12 | 2.1 | 2.7E-03 | P63027, Q96A57, Q5JTD0, Q13439, Q8NFP9, O75122, Q92614, Q9Y6D5, Q9H4A6, Q9Y2Q0, O43493, Q9NTI2                                                                                                                                                             |
| GO:0030018 | Z disc                                   | 11 | 1.9 | 2.9E-03 | Q0ZGT2, Q12955, Q8WX93, P23634, Q16637, P21333, P16157, P04792, Q01484, P02730, Q9UNE7                                                                                                                                                                     |
| GO:0030424 | axon                                     | 16 | 2.8 | 3.0E-03 | Q9NQ8T, P27824, Q9UQ16, Q8WXF7, Q8WX93, P07197, Q96N67, P56730, A0A0G2JMX7, P35580, P42858, Q9H2P0, P12036, Q5T1M5, Q9UPA5, P26232                                                                                                                         |
| GO:0043231 | intracellular membrane-bounded organelle | 30 | 5.3 | 3.1E-03 | Q6IAA8, P51531, Q13595, P52701, O95391, P35221, O94979, D6REX3, O00391, Q15036, Q7Z5K2, Q9H4A6, O15240, P15056, Q13895, D3DUW5, Q9BWU0, P63027, Q99996, P23634, P20020, Q9Y2Q0, Q8ND56, Q8NDX5, A0A140VK92, Q13813, Q641Q2, Q13439, Q8NEY8, P35658, Q14247 |
| GO:0005819 | spindle                                  | 11 | 1.9 | 3.5E-03 | Q96JM3, P35580, Q08J23, P83916, P61266, Q13185, A0A0U4BW16, Q14194, Q14980, P04792, P35579, Q3KQU3                                                                                                                                                         |
| GO:0005720 | nuclear heterochromatin                  | 5  | 0.9 | 3.8E-03 | P83916, Q96PU4, P46100, Q13185, O75475                                                                                                                                                                                                                     |

|            |                                      |    |     |         |                                                                                                                        |
|------------|--------------------------------------|----|-----|---------|------------------------------------------------------------------------------------------------------------------------|
| GO:0045121 | membrane raft                        | 15 | 2.6 | 3.8E-03 | Q6NZI2, Q6IAA8, P27105, P18206, P31323, P45880, Q9BTU6, P19634, E9PDH4, P20020, Q15762, Q01484, P21796, Q09666, P07948 |
| GO:0042641 | actomyosin                           | 4  | 0.7 | 4.8E-03 | Q16623, P35580, Q92614, A0A0U4BW16, P35579                                                                             |
| GO:0016580 | Sin3 complex                         | 4  | 0.7 | 6.1E-03 | Q13547, Q9H7L9, Q92769, O75376                                                                                         |
| GO:0072562 | blood<br>microparticle               | 12 | 2.1 | 6.2E-03 | P11166, P02671, P02751, P27105, P01042, P02675, A5PL32, P02765, Q9BY44, P01008, P68871, P02730                         |
| GO:0043209 | myelin sheath                        | 12 | 2.1 | 6.2E-03 | Q05193, P07900, P27824, P18669, P12036, P45880, P17600, P10515, Q92597, Q16352, P21796, Q16555                         |
| GO:0000775 | chromosome,<br>centromeric<br>region | 7  | 1.2 | 7.1E-03 | Q9NTI5, P83916, Q13185, Q7Z5K2, Q29RF7, P49450, Q9UQE7                                                                 |
| GO:0071565 | nBAF complex                         | 4  | 0.7 | 7.6E-03 | P51531, Q92922, Q8NFD5, F8VXC8                                                                                         |
| GO:0097418 | neurofibrillary<br>tangle            | 3  | 0.5 | 8.5E-03 | A0A0G2JMX7, P07197, P12036                                                                                             |
| GO:0030027 | lamellipodium                        | 12 | 2.1 | 9.0E-03 | B7Z6G2, P35580, Q6DEN2, Q8WX93, P49023, O60716, P19634, P35221, Q16513, Q4VCS5, P26232, Q14247                         |
| GO:0005903 | brush border                         | 7  | 1.2 | 9.0E-03 | Q9UHB6, D3DUW5, Q9UEY8, P35580, Q15149, P18206, A0A0U4BW16, P35579                                                     |
| GO:0019013 | viral<br>nucleocapsid                | 5  | 0.9 | 9.3E-03 | P07910, O75643, Q09666, B4DY08, Q14103, P09651                                                                         |
| GO:0030687 | preribosome,                         | 5  | 0.9 | 1.1E-02 | Q9Y4W2, Q9H6F5, P05387, Q14137, P05388                                                                                 |

|            |                               |    |     |         |                                                                                                                        |
|------------|-------------------------------|----|-----|---------|------------------------------------------------------------------------------------------------------------------------|
|            | large subunit precursor       |    |     |         |                                                                                                                        |
| GO:0030673 | axolemma                      | 4  | 0.7 | 1.1E-02 | Q9Y2J2, P16157, A0A087WUZ3, Q9UPT6                                                                                     |
| GO:0000790 | nuclear chromatin             | 13 | 2.3 | 1.4E-02 | P51531, Q9H1E3, Q9Y618, P52701, Q92769, O75376, Q14839, O96019, F8VXC8, Q13547, P07910, P16402, B4DY08, Q92922         |
| GO:0005652 | nuclear lamina                | 3  | 0.5 | 1.7E-02 | P02545, B7ZKY2, P61266                                                                                                 |
| GO:0016593 | Cdc73/Paf1 complex            | 3  | 0.5 | 1.7E-02 | Q6PD62, Q8WVC0, Q8N7H5                                                                                                 |
| GO:0005815 | microtubule organizing center | 11 | 1.9 | 1.7E-02 | Q9Y4W2, Q14498, Q7Z6E9, Q9BZC7, Q5TBA9, O75122, P61266, Q9Y6D5, O60271, Q14194, O95359                                 |
| GO:0015030 | Cajal body                    | 6  | 1.1 | 1.8E-02 | O43395, Q86XP3, Q9Y2F5, Q16637, Q9UQ35, A0A0A0MRM9                                                                     |
| GO:0031201 | SNARE complex                 | 6  | 1.1 | 2.1E-02 | O00161, P63027, Q16623, O75396, P61266, O75379                                                                         |
| GO:0031965 | nuclear membrane              | 14 | 2.5 | 2.1E-02 | Q86UE4, Q9P035, P52948, Q96KC8, Q16352, H0YBE0, P02545, P49792, O75694, P42166, Q96T37, Q8NC56, Q8WYP5, Q9UK76, P29590 |
| GO:0005635 | nuclear envelope              | 11 | 1.9 | 2.2E-02 | Q8NE71, P02545, P49585, P49792, O75694, Q13185, P42166, L0R530, Q9NYB0, P52948, O15173                                 |
| GO:0005883 | neurofilament                 | 3  | 0.5 | 2.2E-02 | P07197, P12036, Q16352                                                                                                 |
| GO:0001939 | female pronucleus             | 3  | 0.5 | 2.2E-02 | P11166, P83916, O43823                                                                                                 |
| GO:0034399 | nuclear periphery             | 4  | 0.7 | 2.4E-02 | A0A0G2JMX7, O75475, Q8WYP5, P52948                                                                                     |
| GO:0005697 | telomerase                    | 4  | 0.7 | 2.4E-02 | O60832, P07910, B3KUY2, B4DY08, Q00839                                                                                 |

|            |                                           |    |     |         |                                                                                                                                                               |
|------------|-------------------------------------------|----|-----|---------|---------------------------------------------------------------------------------------------------------------------------------------------------------------|
|            | holoenzyme<br>complex                     |    |     |         |                                                                                                                                                               |
| GO:0031093 | platelet alpha<br>granule lumen           | 6  | 1.1 | 2.4E-02 | P02671, P02751, O00391, P01042, P02675, P02765                                                                                                                |
| GO:0030425 | dendrite                                  | 18 | 3.2 | 2.5E-02 | Q5JWF2, P05388, E7EX17, O75494, Q9BTU6, Q9Y4F1, Q9UPT6, P56730, P01185, P23588, Q16555,<br>Q96EZ8, A0A0G2JMX7, Q12955, P42858, Q9H2P0, P17600, Q9UPA5, Q14980 |
| GO:0030315 | T-tubule                                  | 5  | 0.9 | 2.6E-02 | Q12955, P23634, Q09666, P19634, Q01484                                                                                                                        |
| GO:0030658 | transport<br>vesicle<br>membrane          | 5  | 0.9 | 2.6E-02 | P10645, Q96C24, Q16849, Q13425, Q8WXD2                                                                                                                        |
| GO:0035145 | exon-exon<br>junction<br>complex          | 4  | 0.7 | 2.7E-02 | Q15287, Q9H307, J3KTL2, Q9Y2W1                                                                                                                                |
| GO:0005577 | fibrinogen<br>complex                     | 3  | 0.5 | 2.8E-02 | P02671, P02751, P02675                                                                                                                                        |
| GO:0005915 | zonula<br>adherens                        | 3  | 0.5 | 2.8E-02 | P18206, O60716, P35221                                                                                                                                        |
| GO:0031252 | cell leading<br>edge                      | 5  | 0.9 | 2.9E-02 | P08670, O75122, Q9H2G2, Q2M2I8, A0A0U4BW16, P35579                                                                                                            |
| GO:0043025 | neuronal cell<br>body                     | 17 | 3.0 | 2.9E-02 | P27824, Q99996, P31323, E7EX17, O75494, Q9BTU6, P21333, P22466, Q07889, Q16555, P23588,<br>B7Z6G2, P35580, P07900, P27708, Q9H2P0, Q16849, Q14980             |
| GO:0035327 | transcriptionall<br>y active<br>chromatin | 4  | 0.7 | 3.0E-02 | C9JFV4, Q9Y2F5, O75475, Q6PD62, B4DR36                                                                                                                        |

|            |                                  |    |     |         |                                                                                                                                            |
|------------|----------------------------------|----|-----|---------|--------------------------------------------------------------------------------------------------------------------------------------------|
| GO:0042470 | melanosome                       | 8  | 1.4 | 3.2E-02 | P11166, P27105, Q15084, O75396, P07900, P27824, P08238, P35749                                                                             |
| GO:0031012 | extracellular matrix             | 16 | 2.8 | 3.4E-02 | P02751, P27824, P15924, P02765, P21333, A0A0U4BW16, P35579, P48681, Q15149, P24821, P02545, P07900, P08670, O43294, Q00839, P04792, Q15388 |
| GO:0019898 | extrinsic component of membrane  | 7  | 1.2 | 3.7E-02 | Q9UEW8, Q9H4G0, Q9Y2J2, Q96C24, P11171, Q9Y4F1, O43491                                                                                     |
| GO:0005637 | nuclear inner membrane           | 5  | 0.9 | 3.9E-02 | Q5JTV8, A8MXP9, Q13185, P42166, Q9Y6X4, P43243                                                                                             |
| GO:0005768 | endosome                         | 13 | 2.3 | 4.0E-02 | A0A024R2C5, Q9BZC7, Q5JTD0, Q9UQN3, Q15036, Q96C24, Q16849, Q9BTU6, O75379, Q9H4A6, Q9UN37, O43493, Q9NTI2                                 |
| GO:0005884 | actin filament                   | 6  | 1.1 | 4.5E-02 | Q08495, Q8WX93, P21333, Q5T1M5, Q4VCS5, Q14247                                                                                             |
| GO:0014704 | intercalated disc                | 5  | 0.9 | 4.5E-02 | P15924, Q12955, P19634, P35221, Q01484                                                                                                     |
| GO:0000922 | spindle pole                     | 8  | 1.4 | 4.6E-02 | A0A024R2C5, Q9Y6G9, Q96TC7, Q5TBA9, O14576, Q9UQE7, Q14980, Q9UN37                                                                         |
| GO:0031519 | PcG protein complex              | 4  | 0.7 | 4.6E-02 | Q3KNV8, P25490, Q14157, Q8NDX5                                                                                                             |
| GO:0000777 | condensed chromosome kinetochore | 7  | 1.2 | 4.7E-02 | Q96JM3, Q9Y6G9, Q12888, O75151, O75122, O14576, Q8WYP5                                                                                     |
| GO:0031224 | intrinsic component of membrane  | 3  | 0.5 | 4.9E-02 | Q5JWF2, A5PL32, Q9BTU6                                                                                                                     |
| GO:0044615 | nuclear pore nuclear basket      | 3  | 0.5 | 4.9E-02 | P49792, P35658, P52948                                                                                                                     |

|            |                            |   |     |         |                        |
|------------|----------------------------|---|-----|---------|------------------------|
| GO:0033270 | paranode<br>region of axon | 3 | 0.5 | 4.9E-02 | Q9NQT8, Q12955, Q9Y2J2 |
|------------|----------------------------|---|-----|---------|------------------------|

---
