# Supplementary material for: Phosphorylation-Mediated Molecular Pathway Changes in Human Pituitary Neuroendocrine Tumors Identified by Quantitative Phosphoproteomics
Source: MDPI journal article supplement (doi:10.3390/cells10092225), 2021-08-27
Supplement: s1 [file s1]

**Table S1.** Clinical information of human nonfunctional PitNET and control tissue samples. DNT = do not test. ACTH = adrenocorticotrophic hormone. GH = growth hormone. PRL = prolactin. FSH = follicle-stimulating hormone. LH =luteinizing hormone. TSH= thyroid-stimulating hormone. hGH = human growth hormone. NFPA = nonfunctional pituitary adenoma. IP = immunoprecipitation. WB = Western blot.

| Group   | Sex    | Age | Clinical information                                                                                                              | Immunohistochemistry                                 | Experiments       |
|---------|--------|-----|-----------------------------------------------------------------------------------------------------------------------------------|------------------------------------------------------|-------------------|
| NFPA    | Male   | 58  | NFPA in sellar region. Sellar floor bone destruction, enriched blood supply in tumor, and tumor size: 4.5 x 3 x 3 cm <sup>3</sup> | ACTH (-), hGH (-), PRL (-), FSH (-), LH (-), TSH (-) | Proteomics        |
|         | Male   | 53  | NFPA in sellar region. Sellar floor bone thinning, and tumor size: 3 x 3 x 2.5 cm <sup>3</sup>                                    | ACTH (-), hGH (-), PRL (-), FSH (-), LH (-), TSH (-) | Proteomics        |
|         | Female | 43  | NFPA in sellar region. Sellar floor bone thinning, enriched blood supply in tumor, and tumor size: 4 x 3 x 3 cm <sup>3</sup>      | ACTH (-), hGH (-), PRL (-), FSH (+), LH (-), TSH (-) | Proteomics        |
|         | Female | 43  | NFPA in sellar region. Adhesion of surrounding tissues, and tumor size: 4.5 x 4 x 6 cm <sup>3</sup>                               | ACTH (-), hGH (-), PRL (-), FSH (+), LH (-), TSH (-) | Proteomics        |
|         | Female | 51  | NFPA in sellar region. Adhesion of surrounding tissues, and tumor size: 4 x 4 x 3.5 cm <sup>3</sup>                               | ACTH (+), hGH (-), PRL (-), FSH (+), LH (-), TSH (-) | IP/WB             |
|         | Female | 43  | NFPA in sellar region. Sellar floor bone thinning, enriched blood supply in tumor, and tumor size: 3.5 x 3 x 2.5 cm <sup>3</sup>  | ACTH (-), hGH (-), PRL (-), FSH (-), LH (-), TSH (-) | IP/WB             |
|         | Female | 44  | NFPA in sellar region. Sellar floor bone thinning, and tumor size: 2.5 x 2.9 x 1.8 cm <sup>3</sup>                                | ACTH (-), hGH (-), PRL (-), FSH (-), LH (-), TSH (-) | IP/WB             |
| Control | Male   | 36  | White, Multiple toxic materials. Blood alcohol = 0.5                                                                              | DNT                                                  | Proteomics; IP/WB |

|        |    |                                                                                                       |     |                   |
|--------|----|-------------------------------------------------------------------------------------------------------|-----|-------------------|
|        |    | g/L. Blood: HepB (+), HepC (-), HIV (-).                                                              |     |                   |
| Female |    | White, 15 h gunshot wound to head. No drugs or alcohol. Blood: HepB (-), HepC (-), HIV (-).           | DNT | Proteomics; IP/WB |
| Female | 34 | Black, Gunshot wound to chest. Blood alcohol = 0.3 g/L; no drugs. Blood: HepB (+), HepC (-), HIV (-). | DNT | Proteomics; IP/WB |
| Female | 40 | White, Multiple toxic compounds. Blood: HepB (+), HepC (+), HIV(-).                                   | DNT | Proteomics; IP/WB |
| Male   | 45 | White, Drowning. Blood alcohol = 3.1 g/L; no other drugs detected. Blood: HepB (+), HepC (+), HIV(-). | DNT | IP/WB             |

---
